# Supplementary material for: Microsurgical treatment of posterior inferior cerebellar aneurysms based on angioarchitecture supplemented by high-resolution vessel wall MRI: a case series report
Source: HighWire-hosted journal article supplement (doi:10.1136/svn-2021-001115), 2022-04-06
Supplement: svn-2021-001115supp002_data_supplement.pdf [file svn-2021-001115supp002_data_supplement.pdf]

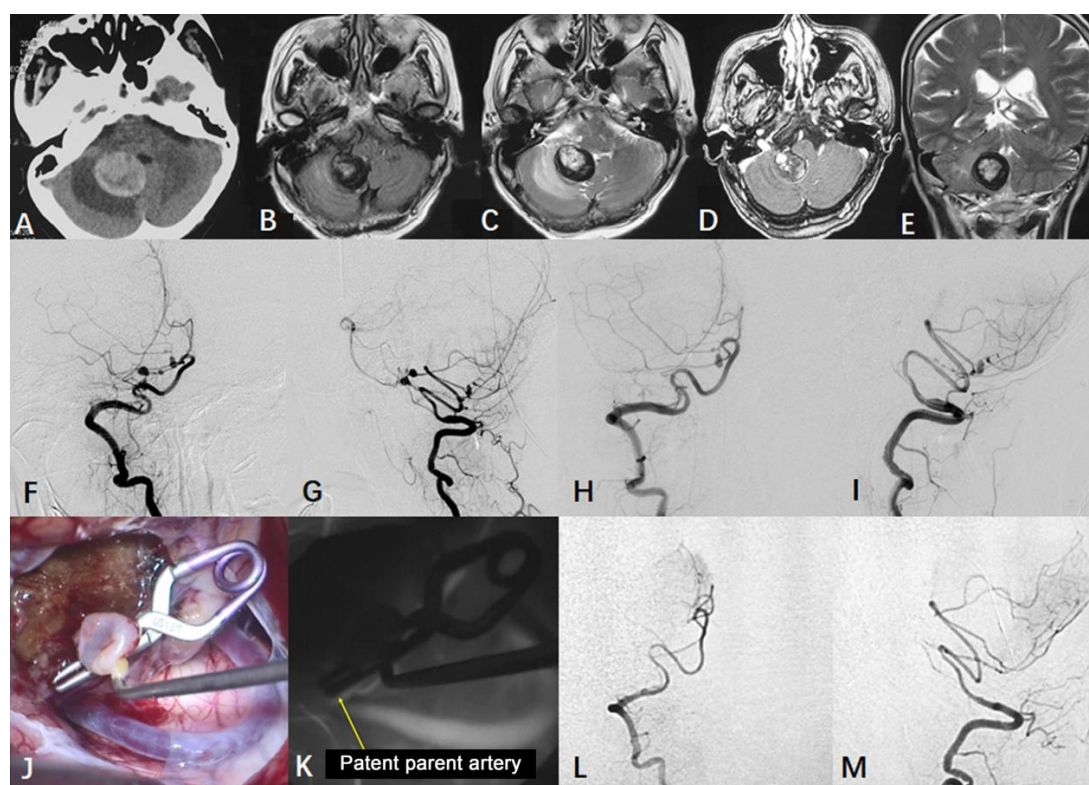

**Supplemental Fig. 1 Case 14: treatment of multiple PICA aneurysms with a hybrid operation.** A. An intracranial lesion was detected in an older male, and the patient had experienced dizziness for 6 months. CT revealed a right cerebellar lesion with hemorrhaging and SAH. B-E: MRI revealed a lesion with a low and mixed T1 signal, mixed T2 signal and uneven enhancement with edema (MRI T1 signal, T2 signal, and T1 enhancement signal: axial view, T2 signal: coronal view). F-G: DSA revealed multiple right PICA aneurysms, with 3 P2 and 2 P5 bead-like fusiform aneurysms (right VA injection, anterior and lateral views). H-I: In the hybrid operation room, the proximal 3 P2 aneurysms were coiled, and post-embolization DSA revealed aneurysm obliteration with parent artery patency (right VA injection, anterior and lateral views). J-K: Using the suboccipital midline approach, the distal 2 P5 aneurysms were clipped. L-M: Aneurysm obliteration and parent artery patency were confirmed by intraoperative ICG and DSA (right VA injection, anterior and lateral views; yellow arrow presents the patent parent artery).
